# Supplementary material
Source: publisher figshare collection journal article supplement (https://sage.figshare.com/ndownloader/files/44607136)
Supplement: Supplementary file 1 [file 44607136]

**Impacts of Nursing Unit Design on Visibility and Proximity and Its Influences on Communication, Privacy, and Efficiency**

**Authors:** Xuan, X., Chen, X., Li, Z.

**Course ID #** HERD80-A

| Full Name | AIA # / EDAC # | Email | Phone # |
|-----------|----------------|-------|---------|
|           |                |       |         |

**Learning Objective 1:** To understand the working flow of nurses in nursing units.

**Learning Objective 2:** To understand the impact of physical environments on visibility and its Influence on communication, privacy, and efficiency.

**Learning Objectives 3:** To understand the impact of position of clinical spaces on proximity and its influence on communication and efficiency.

**Learning Objective 4:** To understand the situation of nursing units in China and improvements proposed by nurses, and to master the implications for nursing unit design.

**Question 1:** To improve the communication between nurses in NS and doctors in doctor's office, which partition should be used at back of NS?

- a. gypsum board partition
- b. translucent glass partition
- c. no partition
- d. solid partition

**Question 2:** To achieve a balance between visibility to patients and privacy, what type of wall can be used in medication room?

- a. solid wall
- b. partial glass wall
- c. glass wall
- d. no wall

**Question 3:** In order to reduce walking distance in a nursing unit without workstation-on-wheels, where should disposal room be placed?

---

---

---

To earn AIA continuing education units please complete form, and email Jill Glaser at [jglaser@healthdesign.org](mailto:jglaser@healthdesign.org) and your credits will be uploaded to your AIA account. To earn EDAC continuing education units please complete the form, retain the form for your records and self-submit the credits at the time of your EDAC renewal. The form is your "proof of attendance."
